## Retraction

## Retraction: Improvement of therapeutic effects of mesenchymal stem cells in myocardial infarction through genetic suppression of microRNA-142

Liu-Xue Yang<sup>1,\*</sup>, Chun-Ling Wei<sup>2,\*</sup>, Man-Li Guo<sup>3</sup>, Yong Zhang<sup>2</sup>, Feng Bai<sup>2</sup> and Shao-Gang Ma<sup>2</sup>

<sup>1</sup>Department of Endocrinology and Metabolism, The Second Hospital Affiliated to Guilin Medical College, Guilin 541100, China

<sup>2</sup>Department of Endocrinology and Metabolism, Huai'an Hospital Affiliated to Xuzhou Medical College, Huai'an Second People's Hospital, Huai'an 223002, China

<sup>3</sup>Department of Endocrinology and Metabolism, Suqian People's Hospital, Nanjing Drum Tower Hospital, Suqian 223800, China

\*These authors contributed equally to this work

**Published:** December 31, 2025

**Copyright:** © 2025 Yang et al. This is an open access article distributed under the terms of the [Creative Commons Attribution License](#) (CC BY 4.0), which permits unrestricted use, distribution, and reproduction in any medium, provided the original author and source are credited.

**This article has been retracted:** Oncotarget has completed its investigation of this paper. It was determined that multiple instances of image duplication and overlap with unrelated papers were found. Specifically, we identified the following issues:

- Figure 2B: Alcian blue IHC image overlaps with an image in Figure 1B of reference [1].
- Figure 2D: The CXCR7 western blot image was reproduced in the 2019 article Figure 5C, labeled as CXCR4 [2].
- Figure 3B: The flow cytometry images in the 3rd panel (Hypoxia+MSCs) and 5th panel (Hypoxia+MSCs-C7) duplicate earlier published images found in Figure 3A of reference [3].
- Figure 4E: The image of mice myocardial infarction (MI) heart (MI+mdMSCs group) duplicates image in Figure 4B of published earlier paper [4], representing rat infarcted heart from C-BMSCs group.

We have attempted to contact the authors regarding these findings multiple times without response. Finally the Editorial decision to retract this article has been made.

Original article: Oncotarget. 2017; 8:85549–85558. <https://doi.org/10.18632/oncotarget.20935>

### REFERENCES

1. Zhang B, Zhao N, Zhang J, Liu Y, Zhu D, Kong Y. Mesenchymal stem cells rejuvenate cardiac muscle through regulating macrophage polarization. *Aging (Albany NY)*. 2019; 11:3900–408. <https://doi.org/10.18632/aging.102009>. [PubMed]
2. Gu X, Zhang Q, Zhang W, Zhu L. Curcumin inhibits liver metastasis of gastric cancer through reducing circulating tumor cells. *Aging (Albany NY)*. 2019; 11:1501–9. <https://doi.org/10.18632/aging.101848>. [PubMed]
3. Sui H, Wang K, Xie R, Li X, Li K, Bai Y, Wang X, Bai B, Chen D, Li J, Shen B. NDV-D90 suppresses growth of gastric cancer and cancer-related vascularization. *Oncotarget*. 2017; 8:34516–24. <https://doi.org/10.18632/oncotarget.16563>. [PubMed]
4. Liu XB, Wang JA, Ji XY, Yu SP, Wei L. Preconditioning of bone marrow mesenchymal stem cells by prolyl hydroxylase inhibition enhances cell survival and angiogenesis in vitro and after transplantation into the ischemic heart of rats. *Stem Cell Res Ther*. 2014; 5:111. <https://doi.org/10.1186/scrt499>. [PubMed]
